# Supplementary material
Source: publisher site journal article supplement (https://static.cambridge.org/content/id/urn:cambridge.org:id:article:S0924270819000486/resource/name/S0924270819000486supp001.docx)
Supplement: Supplementary file 1 [file S0924270819000486supp001.docx]

**Supplementary Table 1**. Correlations between serum lipid levels at 9, 15, 18 and 25 years, separately in males and females.

|  |  |  | WOMEN |  |  |  |  |  |  |  |  |  |  |  |  |  |  |  |
| --- | --- | --- | --- | --- | --- | --- | --- | --- | --- | --- | --- | --- | --- | --- | --- | --- | --- | --- |
|  |  |  | 9 years |  |  |  | 15 years |  |  |  | 18 years |  |  |  | 25 years |  |  |  |
|  |  |  | TC | HDL | LDL | TRG | TC | HDL | LDL | TRG | TC | HDL | LDL | TRG | TC | HDL | LDL | TRG |
| MEN | 9 years | TC |  | **0.33** | **0.94** | **0.15** | **0.61** | **0.15** | **0.61** | 0.02 | **0.47** | 0.06 | **0.52** | -0.05 | **0.49** | 0.08 | **0.50** | -0.02 |
|  |  | HDL | **0.47** |  | 0.02 | **-0.42** | 0.12 | **0.60** | -0.09 | **-0.25** | 0.05 | **0.41** | -0.12 | **-0.26** | 0.03 | **0.39** | -0.14 | -0.15 |
|  |  | LDL | **0.93** | 0.14 |  | **0.16** | **0.60** | -0.05 | **0.68** | 0.07 | **0.46** | -0.09 | **0.58** | 0.01 | **0.50** | -0.06 | **0.58** | 0.02 |
|  |  | TRG | **0.25** | **-0.13** | 0.16 |  | **0.16** | **-0.18** | **0.21** | **0.31** | **0.23** | -0.13 | **0.26** | **0.28** | **0.16** | -0.06 | **0.19** | 0.12 |
|  | 15 years | TC | **0.63** | **0.25** | **0.59** | **0.25** |  | **0.29** | **0.92** | **0.25** | **0.62** | 0.14 | **0.62** | 0.07 | **0.61** | **0.17** | **0.55** | 0.03 |
|  |  | HDL | 0.20 | **0.57** | 0.00 | -0.03 | 0.18 |  | -0.05 | **-0.41** | **0.15** | **0.59** | -0.07 | **-0.35** | **0.15** | **0.53** | -0.11 | -0.14 |
|  |  | LDL | **0.61** | 0.10 | **0.62** | 0.24 | **0.93** | **-0.11** |  | **0.27** | **0.57** | -0.09 | **0.67** | 0.15 | **0.59** | -0.04 | **0.64** | 0.06 |
|  |  | TRG | 0.11 | **-0.16** | 0.15 | **0.28** | **0.39** | **-0.36** | **0.39** |  | **0.19** | **-0.19** | **0.24** | **0.42** | 0.08 | -0.14 | **0.13** | **0.21** |
|  | 18 years | TC | **0.44** | 0.21 | **0.40** | 0.15 | **0.66** | -0.02 | **0.64** | **0.36** |  | **0.15** | **0.91** | **0.33** | **0.48** | **0.16** | **0.42** | 0.00 |
|  |  | HDL | 0.20 | **0.55** | 0.03 | **-0.12** | 0.22 | **0.68** | -0.01 | **-0.25** | 0.15 |  | **-0.15** | **-0.25** | 0.10 | **0.52** | **-0.19** | -0.08 |
|  |  | LDL | **0.41** | 0.05 | **0.44** | 0.13 | **0.62** | **-0.22** | **0.68** | **0.41** | **0.94** | -0.11 |  | **0.30** | **0.52** | -0.02 | **0.58** | 0.04 |
|  |  | TRG | 0.09 | -0.06 | 0.09 | **0.26** | 0.18 | **-0.19** | 0.21 | **0.35** | **0.36** | **-0.33** | **0.33** |  | 0.05 | **-0.29** | **0.15** | **0.32** |
|  | 25 years | TC | **0.46** | 0.17 | **0.42** | **0.26** | **0.44** | 0.03 | **0.43** | 0.18 | **0.61** | 0.08 | **0.59** | **0.25** |  | **0.21** | **0.86** | **0.36** |
|  |  | HDL | 0.14 | **0.35** | 0.02 | -0.05 | 0.14 | **0.55** | -0.03 | **-0.25** | 0.04 | **0.65** | **-0.13** | **-0.15** | 0.15 |  | **-0.23** | **-0.32** |
|  |  | LDL | **0.44** | 0.03 | **0.46** | **0.25** | **0.41** | **-0.18** | **0.47** | 0.23 | **0.58** | **-0.15** | **0.63** | **0.27** | **0.91** | **-0.18** |  | **0.33** |
|  |  | TRG | -0.02 | **-0.15** | -0.01 | 0.24 | 0.09 | **-0.27** | 0.16 | **0.33** | **0.25** | **-0.38** | **0.29** | **0.41** | **0.41** | **-0.41** | **0.41** |  |

Total cholesterol (TC), HDL cholesterol (HDL), LDL cholesterol (LDL) and triglycerides (TRG) correlation coefficents are in bold while significant at p≤0.05.
